# Supplementary material
Source: PubMed Central journal article supplement (PMC5373453)
Supplement: ASN.2016050496SupplementaryData.pdf [file ASN.2016050496SupplementaryData.pdf]

Supplement Table.1

The correlation between Stalk-1+GC and the severity or the efficacy of tonsillectomy in severe IgAN patients (proteinuria >0.5 g/gCr)

|                                                                           | Stalk-1+GC<10%<br>(n=8) | Stalk-1+GC≥10%<br>(n=39) | P Value |
|---------------------------------------------------------------------------|-------------------------|--------------------------|---------|
| Proteinuria (g/gCr) before treatment                                      | 0.99±0.36               | 1.46±0.86                | 0.22    |
| Patients whose proteinuria decrease more that 50% after tonsillectomy (%) | 28.6(1/8)               | 71.9 (26/39)             | 0.048   |

Supplement Table.2

Characteristics of IgAN patients before tonsillectomy and after tonsillectomy

|                              | before tonsillectomy | after tonsillectomy | P Value |
|------------------------------|----------------------|---------------------|---------|
| Systolic pressure (mmHg)     | 106.3±9.4            | 109.7±11.7          | 0.1553  |
| Diastolic pressure (mmHg)    | 64.1±7.0             | 63.3±8.9            | 0.1983  |
| Proteinuria/urine Cr (g/gCr) | 1.22±0.86            | 0.60±0.64           | <0.0001 |
| Steroid therapy              | 1                    | 1                   | 1       |
| The use of ACEIs and ARBs    | 19                   | 21                  | 0.6918  |

ACEI, Angiotensin Coverting Enzyme Inhibitor

ARB, Angiotensin II Receptor Blocker
